# Supplementary material for: Structure of a Highly Active Cephalopod S-crystallin Mutant: New Molecular Evidence for Evolution from an Active Enzyme into Lens-Refractive Protein
Source: PubMed Central journal article supplement (PMC4976375; doi:10.1038/srep31176), 2016-08-08
Supplement: srep31176-s1.pdf [file srep31176-s1.pdf]

**Supplementary information for**

**Structure of a Highly Active Cephalopod S-crystallin Mutant: New Molecular  
Evidence for Evolution from an Active Enzyme into Lens-Refractive Protein**

Wei-Hung Tan<sup>1</sup>, Shu-Chun Cheng<sup>1</sup>, Yu-Tung Liu<sup>1</sup>, Cheng-Guo Wu<sup>1</sup>, Min-Han Lin,

Chiao-Che Chen, Chao-Hsiung Lin, and Chi-Yuan Chou\*

Department of Life Sciences and Institute of Genome Sciences

National Yang-Ming University

Taipei 112, Taiwan

---

<sup>1</sup> These authors contributed equally to this work.

\* Correspondence information for Chi-Yuan Chou

Phone: +886-2-28267168, FAX: +886-2-28202449

E-mail: [cychou@ym.edu.tw](mailto:cychou@ym.edu.tw)

## References

- 1 Gouet, P., Courcelle, E., Stuart, D. I. & Metoz, F. ESPript: analysis of multiple sequence alignments in PostScript. *Bioinformatics* **15**, 305-308, (1999).
- 2 Wu, C. G. *et al.* Mechanism for controlling the monomer-dimer conversion of SARS coronavirus main protease. *Acta Crystallogr D Biol Crystallogr* **69**, 747-755, (2013).
- 3 Lin, M. H. *et al.* Structural and functional characterization of MERS coronavirus papain-like protease. *J. Biomed. Sci.* **21**, 54, (2014).
- 4 Chou, C. Y. *et al.* Structural basis for catalysis and ubiquitin recognition by the severe acute respiratory syndrome coronavirus papain-like protease. *Acta Crystallogr D Biol Crystallogr* **70**, 572-581, (2014).
- 5 Schuck, P. Size-distribution analysis of macromolecules by sedimentation velocity ultracentrifugation and lamm equation modeling. *Biophys. J.* **78**, 1606-1619, (2000).
- 6 Ji, X. *et al.* Three-dimensional structure, catalytic properties, and evolution of a sigma class glutathione transferase from squid, a progenitor of the lens S-crystallins of cephalopods. *Biochemistry* **34**, 5317-5328, (1995).

### Extended Data Table 1

#### Summary of crystallographic information for octopus S-crystallin Q108F mutant

| Data Collection                            |                            |
|--------------------------------------------|----------------------------|
| Space group                                | <i>P</i> 6 <sub>4</sub> 22 |
| Cell dimensions                            |                            |
| <i>a</i> , <i>b</i> , <i>c</i> (Å)         | 114.3, 114.3, 63.9         |
| $\alpha$ , $\beta$ , $\gamma$ (°)          | 90, 90, 120                |
| Resolution <sup>a</sup> (Å)                | 30-2.35 (2.43-2.35)        |
| <i>R</i> <sub>merge</sub> <sup>b</sup> (%) | 16.4 (53.2)                |
| <i>I</i> / $\sigma$ <i>I</i>               | 13.3 (4.0)                 |
| Completeness (%)                           | 99.9 (100.0)               |
| Redundancy                                 | 7.1 (7.2)                  |
| Refinement                                 |                            |
| Number of reflections                      | 10,177 (1,251)             |
| <i>R</i> factor <sup>c</sup> (%)           | 19.5                       |
| Free <i>R</i> factor <sup>d</sup> (%)      | 25.0                       |
| Number of atoms                            | 1,782                      |
| Protein                                    | 1,713                      |
| Ligand/ion                                 | 20/5                       |
| Water                                      | 44                         |
| <i>B</i> -factors                          |                            |
| Protein                                    | 24.7                       |
| Ligand/ion                                 | 23.5/28.7                  |
| Water                                      | 26.6                       |
| rmsd                                       |                            |
| Bond length (Å)                            | 0.009                      |
| Bond angles (°)                            | 1.3                        |
| Ramachandran analysis <sup>e</sup> (%)     |                            |
| Favored                                    | 91.4                       |
| Allowed                                    | 8.6                        |
| Disallowed                                 | 0                          |

<sup>a</sup> The numbers in parentheses are for the highest-resolution shell.

<sup>b</sup>  $R_{merge} = \frac{\sum_h \sum_i |I_{hi} - \langle I_h \rangle|}{\sum_h \sum_i I_{hi}}$ , where  $I_{hi}$  is the integrated intensity of a given reflection and  $\langle I_h \rangle$  is the mean intensity of multiple corresponding symmetry-related reflections.

<sup>c</sup>  $R = \frac{\sum_h |F_h^o - F_h^c|}{\sum_h F_h^o}$ , where  $F_h^o$  and  $F_h^c$  are the observed and calculated

structure factors, respectively.

<sup>d</sup> Free  $R$  is  $R$  calculated using a random 5% of data excluded from the refinement.

**Extended Data Table 2**  
**Primer used for making the S-crystallin mutants**

| Primer                             | Sequence (5' to 3')                               |
|------------------------------------|---------------------------------------------------|
| R43K-F                             | CAGAATGGGACAGCATGAAAAACAAGATGCCATGTCA             |
| R43F-R                             | TGACATGGCATCTTGTTTTTCATGCTGTCCCATTCTG             |
| H49N-F                             | ATGAGAAACAAGATGCCATGTAACATGATGCCAATGTTGG          |
| H49N-R                             | CCAACATTGGCATCATGTTACATGGCATCTTGTTTCTCAT          |
| Q64A-F                             | AACAGAACCCAAATTCCCGCGAGTATGGCTATGGCCAG            |
| Q64A-R                             | TGGCCATAGCCATACTCGCGGGAATTTGGGTTCTGTTG            |
| L100F-F                            | CAGACTGCTTCTATGACATCTTGACGATTACATGAGAA            |
| L100F-R                            | TTCTCATGTAATCGTCAAAGATGTCATAGAAGCAGTCTG           |
| D101A-F                            | TGCTTCTATGACATCTTGCTGATTACATGAGAATGTAC            |
| D101A-R                            | GTACATTCTCATGTAATCAGCCAAGATGTCATAGAAGCA           |
| D101N-F                            | GCTTCTATGACATCTTGAACGATTACATGAGAATG               |
| D101N-R                            | CATTCTCATGTAATCGTTCAAGATGTCATAGAAGC               |
| M104V-F                            | GACATGTTGGACGATTACGTGAGAATGTACCAGGATG             |
| M104V-R                            | CATCCTGGTACATTCTCACGTAATCGTCCAAGATGTC             |
| Q108F-F                            | GACGATTACATGAGAATGTACTTCGATGGTAACTGCAGAATG<br>ATG |
| Q108F-R                            | CATCATTCTGCAGTTACCATCGAAGTACATTCTCATGTAATCG<br>TC |
| C112G-F                            | ATGTACCAGGATGGTAACGGCAGAATGATGTTCCAGCGA           |
| C112G-R                            | TCGCTGGAACATCATTCTGCCGTTACCATCCTGGTACAT           |
| L100F/D101N-F                      | GACTGCTTCTATGACATCTTCAACGATTACATGAGAATGTAC        |
| L100F/D101N-R                      | GTACATTCTCATGTAATCGTTGAAGATGTCATAGAAGCAGTC        |
| M104V/Q108F-F                      | GACATCTTGGACGATTACGTGAGAATGTACTTCGATGGT           |
| M104V/Q108F-R                      | ACCATCGAAGTACATTCTCACGTAATCGTCCAAGATGTC           |
| L100F/D101N/M<br>104V-F            | GACTGCTTCTATGACATCTTCAACGATTACGTGAGAATGTAC        |
| L100F/D101N/M<br>104V-R            | GTACATTCTCACGTAATCGTTGAAGATGTCATAGAAGCAGTC        |
| $\Delta$ loop(112-122)-F           | ATGTACCAGGATGGTAACAGCAGCTCCTCTGAGAAG              |
| $\Delta$ loop(112-122)-R           | CTTCTCAGAGGAGCTGCTGTTACCATCCTGGTACAT              |
| $\Delta$ loop(112-122)/Q<br>108F-F | GATTACATGAGAATGTACTTCGATGGTAAACAGCAGCTCC          |
| $\Delta$ loop(112-122)/Q<br>108F-R | GGAGCTGCTGTTACCATCGAAGTACATTCTCATGTAATC           |

**Extended Data Table 3**  
**Steady-state kinetic parameters of S-crystallin mutants**

| Protein <sup>a</sup>           | [Protein] ( $\mu\text{M}$ ) | $K_{m,\text{GSH}}$ (mM) <sup>c</sup> | $K_{m,\text{CDNB}}$ (mM) <sup>c</sup> | $k_{\text{cat}}$ ( $\text{s}^{-1}$ ) <sup>c</sup> |
|--------------------------------|-----------------------------|--------------------------------------|---------------------------------------|---------------------------------------------------|
| R43K                           | 0.3                         | $0.23 \pm 0.07$                      | $1.3 \pm 0.1$                         | $0.40 \pm 0.01$                                   |
| H49N                           | 0.5                         | $0.13 \pm 0.02$                      | $5.1 \pm 1.8$                         | $0.60 \pm 0.14$                                   |
| Q64A                           | 5.4                         | $6.3 \pm 0.5$                        | unsaturated                           | $0.03 \pm 0.003$                                  |
| L100F                          | 0.07                        | $2.5 \pm 0.3$                        | $2.8 \pm 0.4$                         | $3.7 \pm 0.3$                                     |
| D101A                          | 0.4                         | $2.6 \pm 0.5$                        | $2.2 \pm 0.6$                         | $1.2 \pm 0.2$                                     |
| D101N                          | 0.5                         | $0.4 \pm 0.04$                       | $2.5 \pm 0.6$                         | $0.41 \pm 0.05$                                   |
| M104V                          | 0.09                        | $1.1 \pm 0.1$                        | $0.65 \pm 0.07$                       | $2.3 \pm 0.1$                                     |
| Q108F                          | 0.02                        | $8.2 \pm 0.8$                        | unsaturated                           | $10.6 \pm 0.6$                                    |
| C112G                          | 1.7                         | $0.02 \pm 0.002$                     | unsaturated                           | $0.08 \pm 0.002$                                  |
| L100F/Q108F                    | 0.02                        | $3.7 \pm 0.5$                        | $1.4 \pm 0.2$                         | $10.8 \pm 0.5$                                    |
| D101A/Q108F                    | 0.03                        | $4.1 \pm 0.5$                        | $5.3 \pm 1.2$                         | $24.3 \pm 3.5$                                    |
| D101N/Q108F                    | 0.01                        | $5.1 \pm 0.5$                        | $0.67 \pm 0.11$                       | $13.4 \pm 0.6$                                    |
| M104V/Q108F                    | 0.02                        | $10.0 \pm 1.6$                       | $4.1 \pm 0.7$                         | $11.6 \pm 1.1$                                    |
| L100F/M104V/Q108F              | 0.02                        | $3.7 \pm 0.4$                        | $2.4 \pm 0.3$                         | $8.5 \pm 0.5$                                     |
| $\Delta\text{loop}^{\text{b}}$ | 0.6                         | $2.2 \pm 0.2$                        | $3.3 \pm 0.6$                         | $0.38 \pm 0.04$                                   |
| $\Delta\text{loop/L100F}$      | 0.07                        | $5.7 \pm 0.9$                        | $4.5 \pm 1.0$                         | $2.0 \pm 0.3$                                     |
| $\Delta\text{loop/D101N}$      | 1.1                         | $5.3 \pm 0.6$                        | $3.9 \pm 0.7$                         | $0.4 \pm 0.04$                                    |
| $\Delta\text{loop/M104V}$      | 0.7                         | $6.1 \pm 1.3$                        | $2.3 \pm 0.5$                         | $0.32 \pm 0.02$                                   |
| $\Delta\text{loop/Q108F}$      | 0.05                        | $6.2 \pm 0.9$                        | $1.9 \pm 0.5$                         | $5.2 \pm 0.4$                                     |

<sup>a</sup> For GSH titration, the concentration of CDNB was 3.5 mM. For CDNB titration, the concentration of GSH was 10 mM.

<sup>b</sup> The loop between  $\alpha 4$  and  $\alpha 5$  helices (residue 112-122) was deleted and is designated as  $\Delta\text{loop}$ .

<sup>c</sup> Data were fitted to the Michaelis-Menten equation and the  $R_{\text{sqr}}$  values were 0.980 to 0.999, respectively. All the assays were repeated at least twice to ensure reproducibility.

**Extended Data Table 4****Thermal stability of S-crystallin mutants with or without 1 mM GSH**

| Protein <sup>a</sup> | T <sub>m</sub> (°C) | T <sub>m</sub> in GSH<br>(°C) | ΔT <sub>m1</sub><br>(mutant-WT) | ΔT <sub>m2</sub><br>(in GSH-apoform) |
|----------------------|---------------------|-------------------------------|---------------------------------|--------------------------------------|
| L100F                | 42.8 ± 1.7          | 48.1 ± 2.6                    | -5.4                            | 5.3                                  |
| D101N                | 45.5 ± 1.1          | 48.8 ± 1.4                    | -2.7                            | 3.3                                  |
| M104V                | 45.1 ± 1.2          | 47.4 ± 1.9                    | -3.1                            | 2.3                                  |
| Q108F                | 49.1 ± 0.7          | 48.8 ± 1.4                    | 0.9                             | -0.3                                 |
| C112G                | 50.7 ± 0.7          | 58.2 ± 2.2                    | 2.5                             | 7.5                                  |
| L100F/Q108F          | 43.7 ± 0.9          | 43.6 ± 1.3                    | -4.5                            | -0.1                                 |
| D101N/Q108F          | 45.2 ± 1.3          | 46.3 ± 1.4                    | -3.0                            | 1.1                                  |
| M104V/Q108F          | 44.1 ± 1.7          | 44.8 ± 1.7                    | -4.1                            | 0.7                                  |
| L100F/M104V/Q108F    | 41.1 ± 0.6          | 43.3 ± 1.8                    | -7.1                            | 2.1                                  |
| Δloop                | 46.9 ± 0.9          | 46.5 ± 1.4                    | -1.3                            | -0.4                                 |
| Δloop/L100F          | 45.5 ± 1.3          | 45.2 ± 1.5                    | -2.7                            | -0.3                                 |
| Δloop/D101N          | 43.1 ± 1.2          | 45.4 ± 1.5                    | -5.1                            | 2.3                                  |
| Δloop/M104V          | 45.9 ± 0.8          | 46.7 ± 1.9                    | -2.3                            | 0.8                                  |
| Δloop/Q108F          | 43.5 ± 0.9          | 43.1 ± 1.8                    | -4.7                            | -0.4                                 |

<sup>a</sup> The protein concentration was at 7.2 μM. The ellipticity at 222 nm was monitored at varying temperature ranging from 25 to 85°C. The results were fitted to the two-state unfolding model to calculate T<sub>m</sub> of S-crystallin.

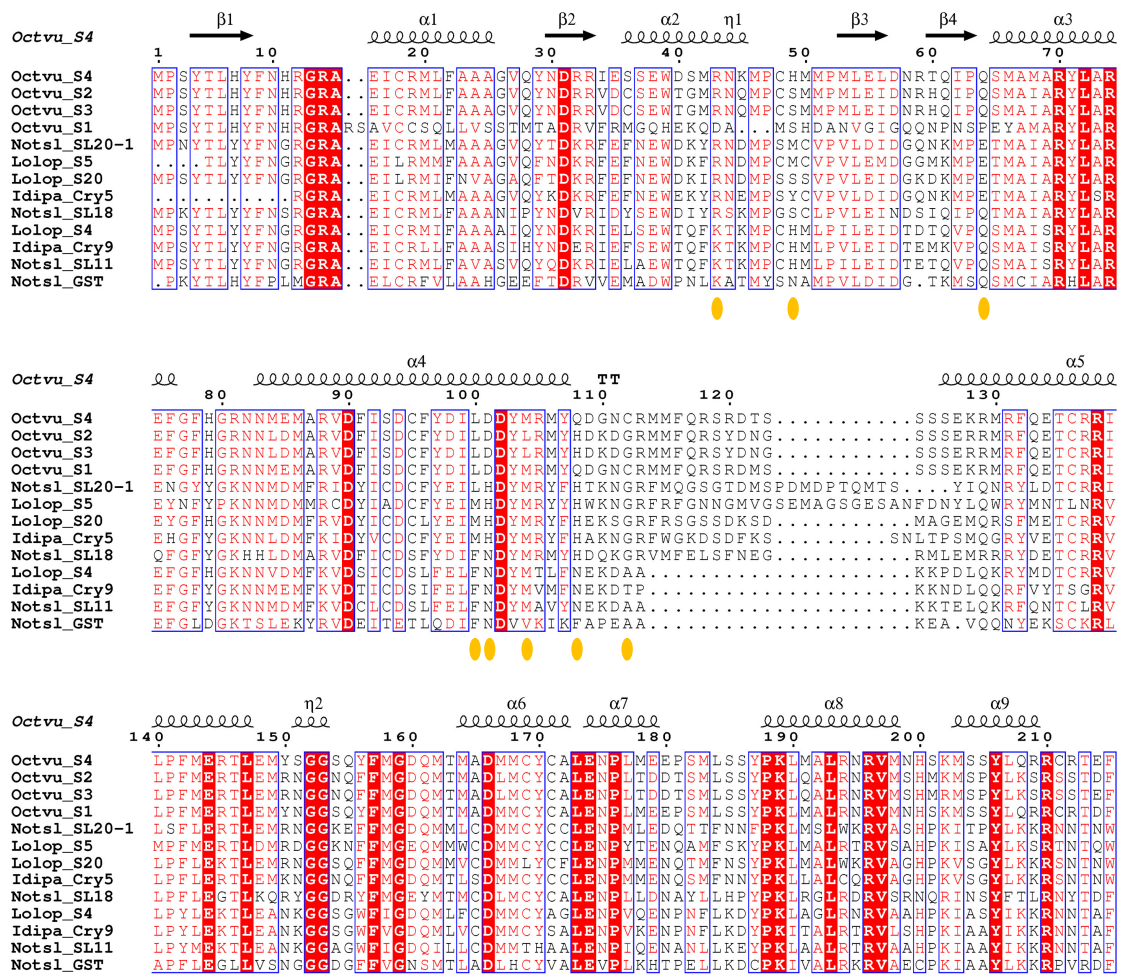

**Extended Data Fig. 1.** Sequence alignment of S-crystallins and GST- $\sigma$  from cephalopods. Modified from an output from ESPript<sup>1</sup>. For comparison, Octvu\_S4 shares 52-82% amino acid sequence identity with Octvu\_S2 (accession number: P27014), S3 (Q25626), S1 (P27013), Notsl\_SL20-1 (P18425), Lolop\_S5 (Q25359), Lolop\_S20 (Q25371), Idipa\_Cry5 (A0A0H5ANU6), Lolop\_S4 (Q25357), Notsl\_SL18 (P27016; residues 1-120 and 214-308 were used), Idipa\_Cry9 (A0A0H5ARE1), Notsl\_SL11 (P18426) and 38% amino acid sequence identity with Notsl\_S4 (1GSQ\_A), respectively. Orange ovals indicate some important residues in the active site that have been mutated in the present studies.



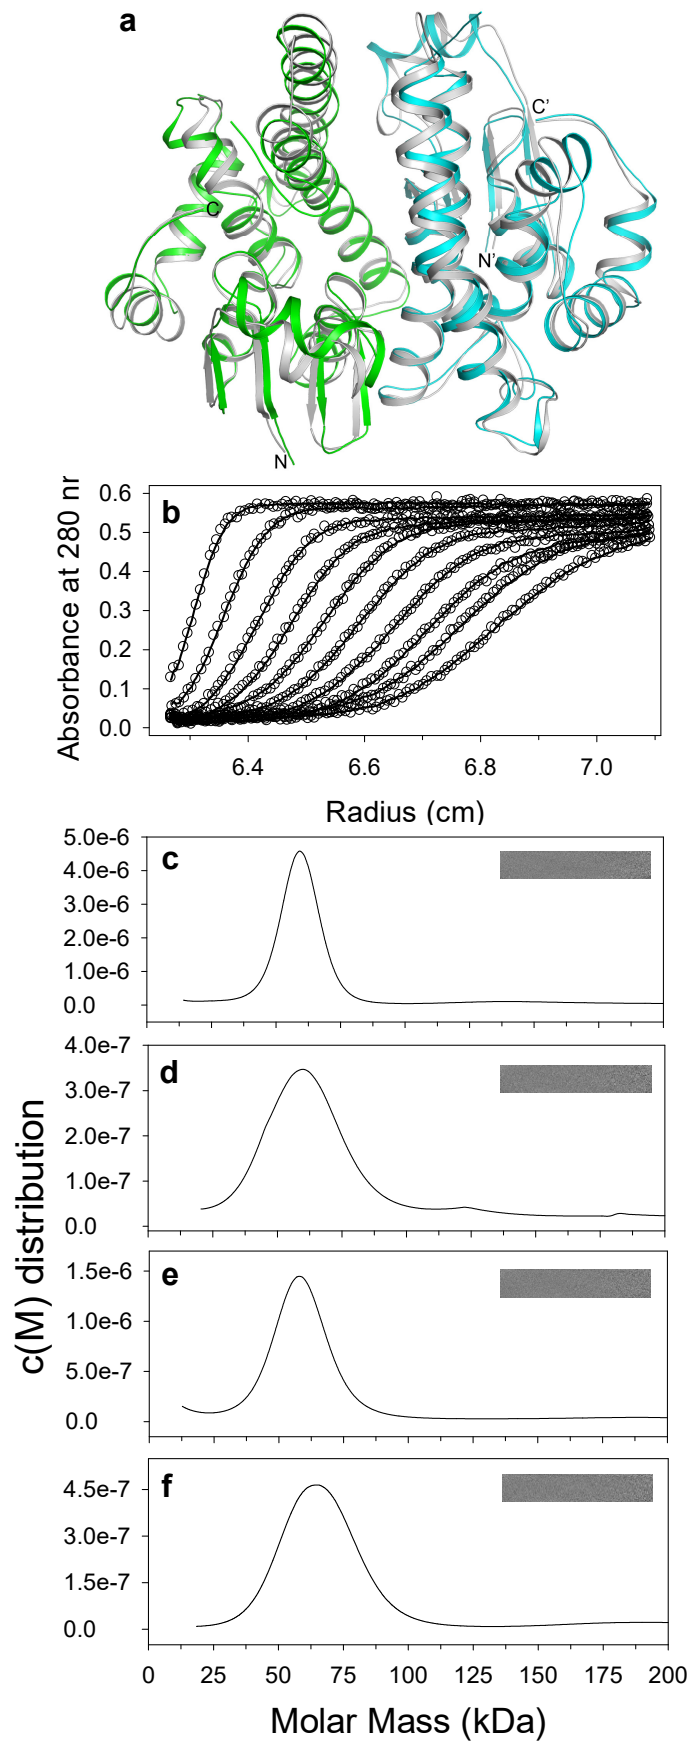

**Extended Data Fig. 2.** The octopus S-crystallin forms a stable dimer. (a) Overlay of

the dimeric S-crystallin and GST- $\sigma$ . The dimers show similar orientation. (b) Traces of absorbance at 280 nm of the S-crystallin in 100 mM phosphate buffer (pH 6.5) during the sedimentation-velocity experiment<sup>2-4</sup> by analytical ultracentrifugation. The protein concentration was 1 mg/ml. For clarity, only every two scan is shown. The circles represent experimental data and the lines are the results after fitting to the Lamm equation using SEDFIT<sup>5</sup>. (c-f) The continuous c(M) distribution of S-crystallin and its mutants, L100F/D101N,  $\Delta$ Loop/L100F/D101N and L100F/D101N/M104V/Q108F, all show a major species located at ~60 kDa. It indicates that it is a dimer as the molar mass of monomeric S-crystallin is 28 kDa. The residual bitmaps of the raw data and the best-fit result are shown as the gray bar. The protein concentration for the distribution analysis was 0.025 mg/ml (0.9  $\mu$ M).

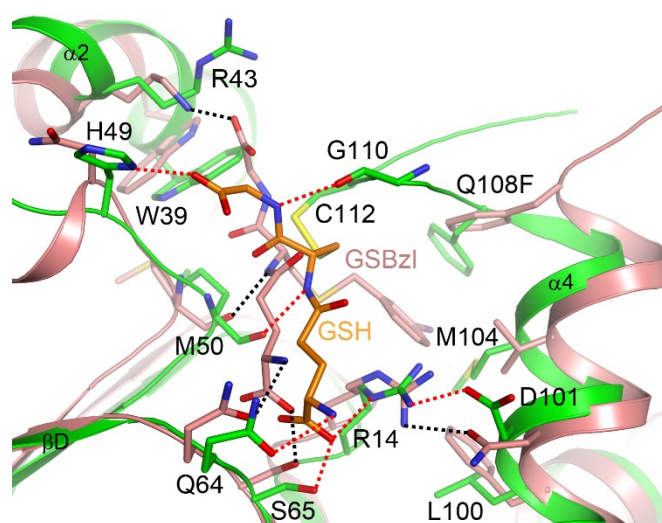

**Extended Data Fig. 3.** Overlay of the active sites of octopus S-crystallin Q108F mutant in complex with GSH (colored by green) and GST- $\sigma$  in complex with S-(3-iodobenzyl) glutathione (GSBzI) (colored by salmon)<sup>6</sup>. The iodobenzyl ring of GSBzI is located in the hydrophobic pocket consisted by the residues Phe98, Val102 and Phe106 of GST- $\sigma$ , while the equivalent residues in S-crystallin are Leu100, Met104 and Gln108, respectively.

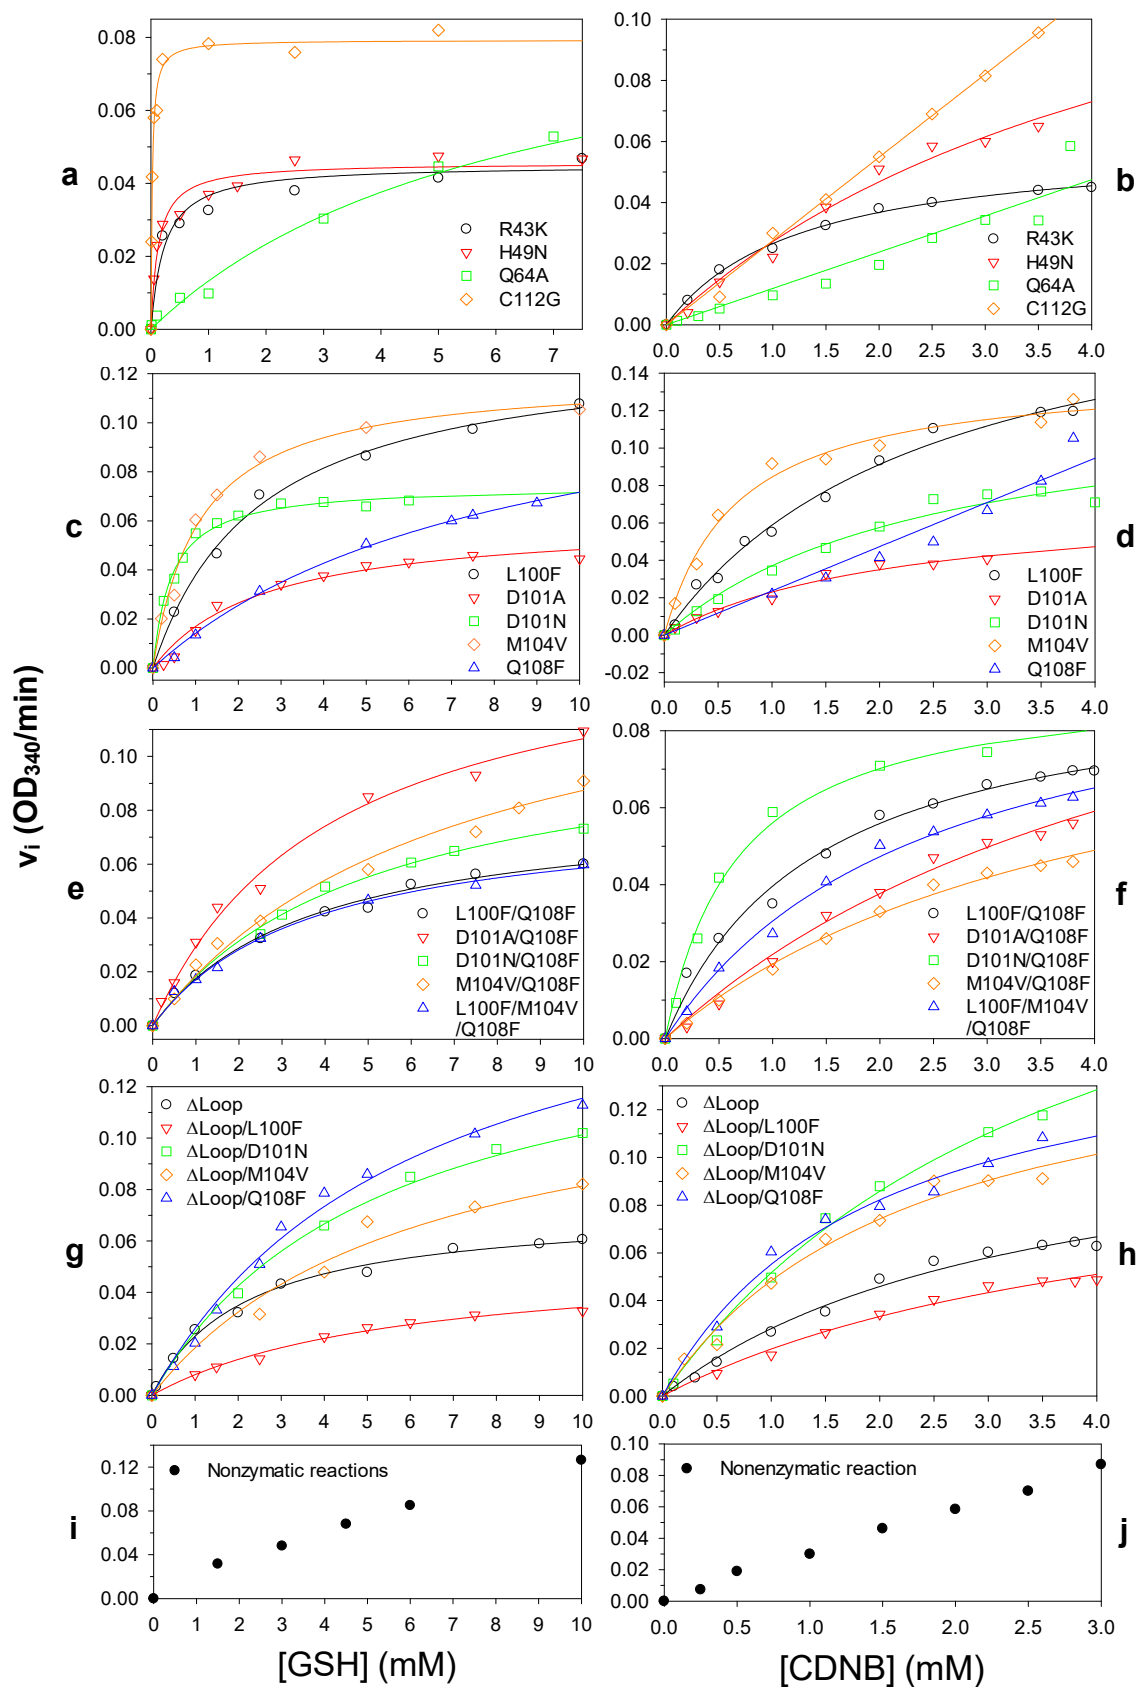

**Extended Data Fig. 4.** The GST activity of various S-crystallin mutants. Plots of the initial velocity as a function of the concentration of the two substrates GSH (a, c, e, g) and CDNB (b, d, f, h) for S-crystallin mutants and nonenzymatic reactions (i, j) were

shown, respectively. The solid lines are the best-fit by the Michaelis-Menten equation. The kinetic parameters such as  $K_m$  and  $k_{cat}$  from the best fit were shown in Table 1 and Extended data Table 3.

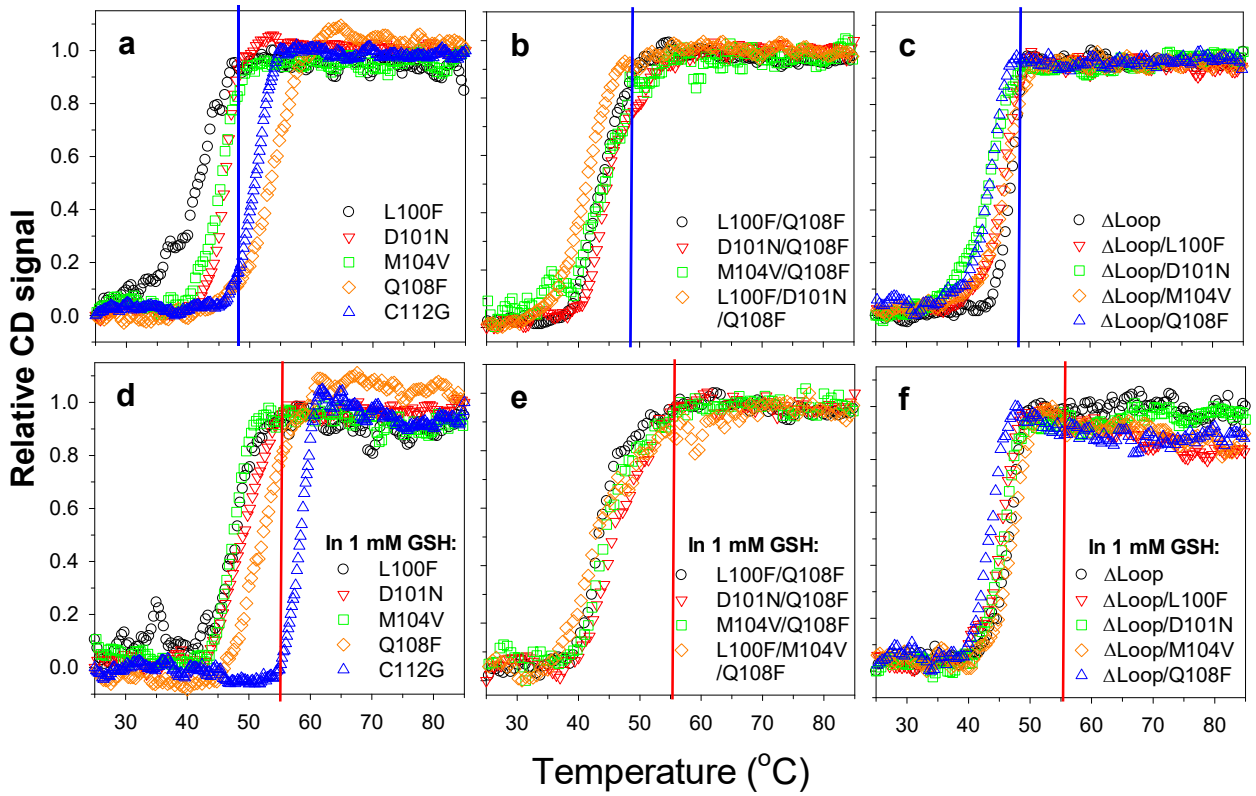

**Extended Data Fig. 5.** Thermal stability of S-crystallin mutants without (a-c) and with (d-f) 1 mM GSH by circular dichroism spectroscopy. Plot of the relative CD signal from the ellipticity at 222 nm as a function of the temperature for the S-crystallin mutants, respectively. The protein concentration was at 7.2  $\mu\text{M}$ . The results were fitted to calculate the  $T_m$ , which are shown in Table 2. For comparison, the blue and red lines showed the  $T_m$  of wild-type S-crystallin without and with 1 mM GSH, respectively.

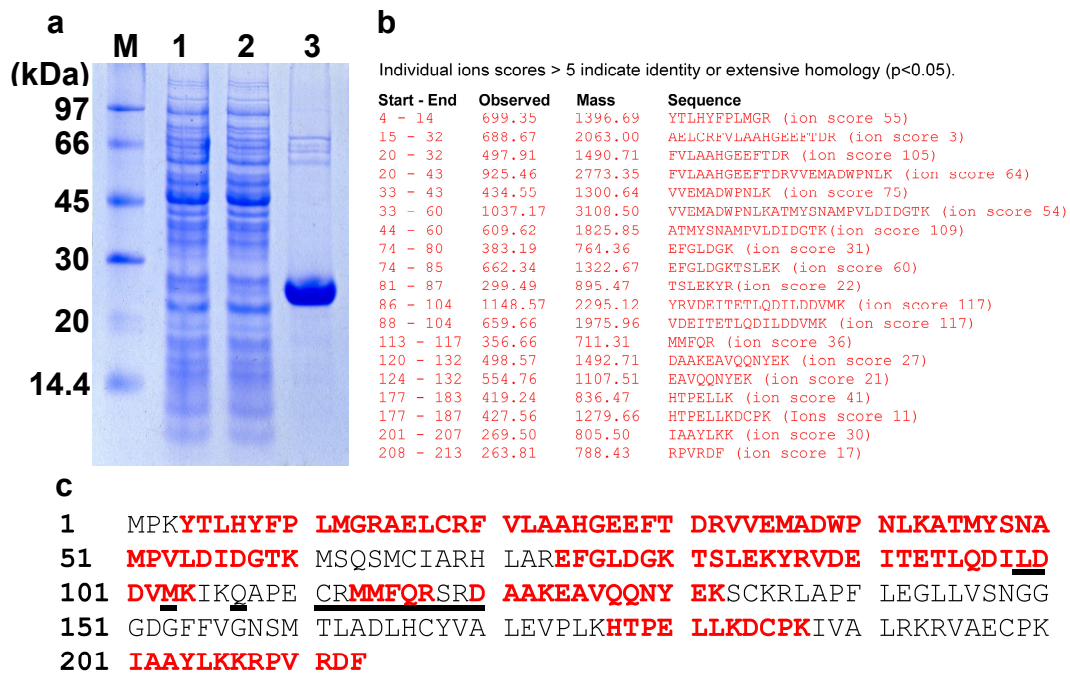

**Extended Data Fig. 6.** Expression and purification of recombinant “S-crystallin”-like GST. (a) Protein identification by SDS-PAGE. M: molecular marker. Lane 1-3: cytoplasmic fraction, flow through, elution from the nickel affinity column. (b-c) Protein sequence identification by mass spectrometry. The protein was digested by trypsin and then analyzed by LC-MS/MS spectrometry. There are 19 matched peptides observed (b) and 61% sequence coverage are shown in bold red (c). Underlines show the point mutations and loop insertion.
